# Supplementary material for: The redox mediated – scanning droplet cell system for evaluation of the solid electrolyte interphase in Li-ion batteries
Source: Royal Society of Chemistry journal article supplement (doi:10.1039/d3ra00631j), 2023-01-01
Supplement: d3ra00631j1.pdf [file d3ra00631j1.pdf]

## *Supporting Information*

# The Redox Mediated - Scanning Droplet Cell System for Evaluation of the Solid Electrolyte Interphase in Li-ion Batteries

*David Muñoz-Torrero<sup>a,b</sup>, Carla Santana Santos<sup>c</sup>, Enrique García-Quismondo<sup>d</sup>, Stefan Dieckhöfer<sup>c</sup>, Thomas Erichsen<sup>e</sup>, Jesús Palma<sup>d</sup>, Wolfgang Schuhmann<sup>c</sup>, Edgar Ventosa<sup>a,b\*</sup>*

a – Department of Analytical Chemistry, Faculty of Science. University of Burgos. Plaza de Misael Bañuelos s/n, 09001 Burgos, Spain. E-mail: [eventosa@ubu.es](mailto:eventosa@ubu.es)

b – ICCRAM, University of Burgos. Plaza de Misael Bañuelos s/n, 09001 Burgos, Spain.

c – Analytical Chemistry – Center for Electrochemical Sciences (CES), Faculty of Chemistry and Biochemistry, Ruhr University Bochum, Universitätsstr 150, D-44780 Bochum, Germany.

d – Electrochemical Processes Unit. IMDEA Energy Institute. Avda. Ramón de la Sagra 3, 28935 Móstoles, Spain.

e – Sensolytics GmbH, Mettestr. 25, D-44803 Bochum, Germany

### Section S1. The scanning droplet-cell system (SDCS)

The SDCS apparatus comprises seven components: i) an SDC head, which is the electrochemical probe; ii) a pumping system, which is connected to the head and fills it with electrolyte; iii) a positioning system, which moves the head in the X, Y and Z directions with a sub- $\mu\text{m}$  precision; iv) a force sensor coupled to the SDC head to control the SDCS head force on the sample surface; v) a potentiostat, which controls the electrochemical cell; vi) an AD/DA converter; and a vii) a computer that controls each component of the SDCS.

The key element of the SDCS is its head. **Figure S1** shows a picture of the 3-D printed head developed in this work.

Prior to cell fabrication, the 3D-printing material stability in organic solvents was studied. Little pieces of the printed material were exposed to propylene carbonate (PC) and LP30 electrolyte for stability test. Those pieces remained stable in weight and shape for more than two weeks, and the electrolyte and PC stayed transparent, demonstrating the stability of the cell material against organic solvents.

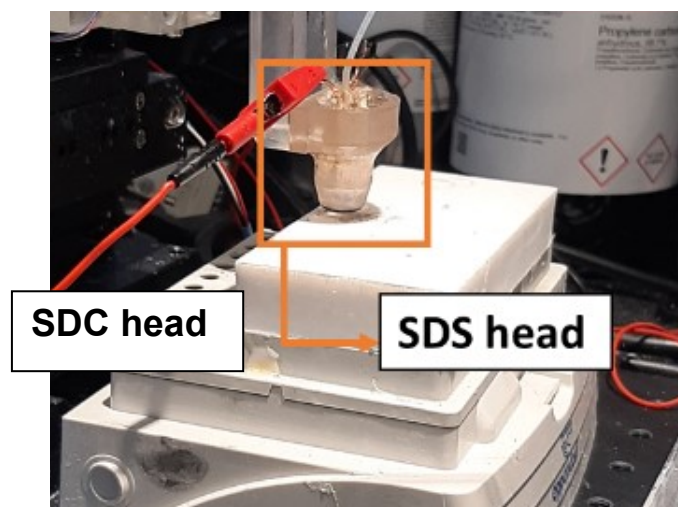

**Figure S1.** Picture of the 3-D printed head of the SDCS inside the Ar-filled glovebox.

## Section S2. Cyclic voltammetry of redox mediators and Cu foil.

The redox potential of ferrocene, which is commonly used as redox mediator for scanning electrochemical microscopy, is very close to the oxidation potential of Cu as shown in **Figure S2**.

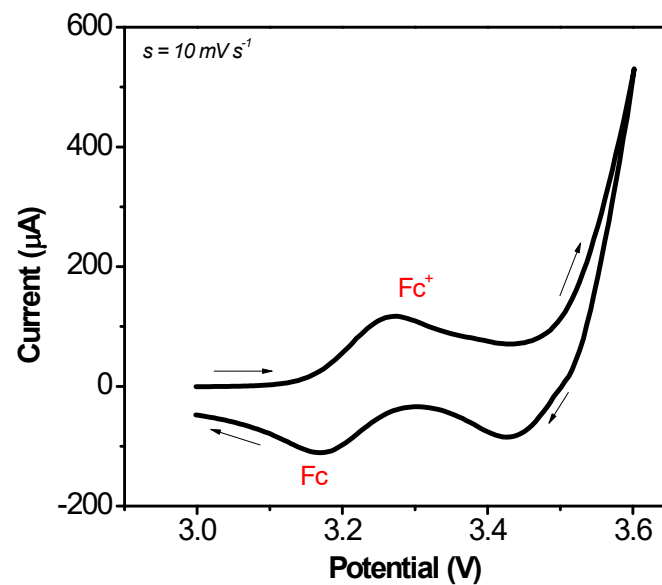

**Figure S2.** CV recorded on Cu substrate using ferrocene (Fc) as redox mediator at  $10 \text{ mV s}^{-1}$ .

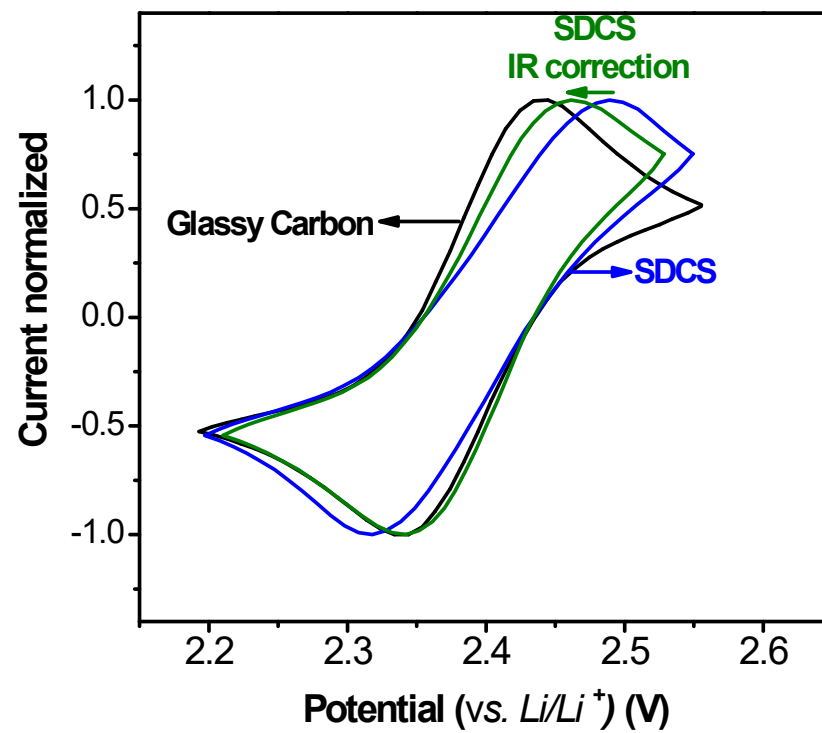

**Figure S3.** MVD CV recorded on Cu foil using a SDCS set up (blue), on Cu foil using a SDCS set up with a IR correction applied and using a 3-electrode cell whose working electrode is a glassy carbon.

### Section S3. Conventional electrochemistry using the SDCS.

The SDCS can be used to perform classic electrochemical measurements such as linear sweep voltammetry for the SEI formation (**Figure S4**) and galvanostatic lithiation-delithiation measurements (**Figure S5**)

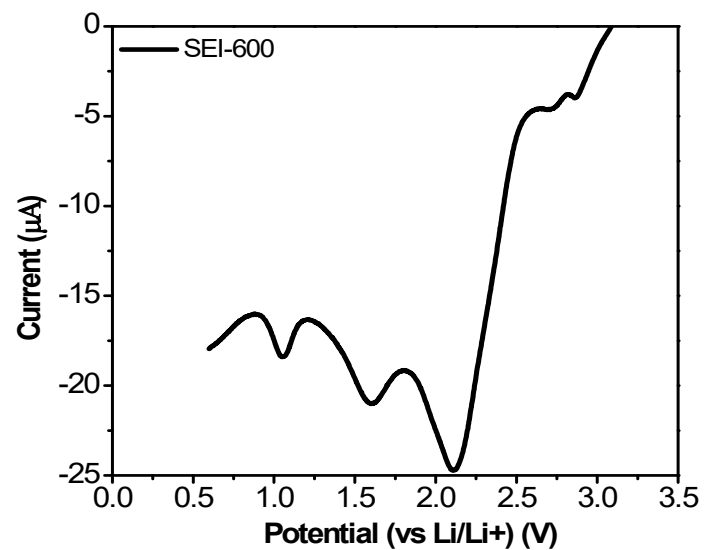

**Figure S4.** LSV from OCP to 600mV at  $5\text{mV s}^{-1}$  recorded on Cu foil during SEI-600 formation.

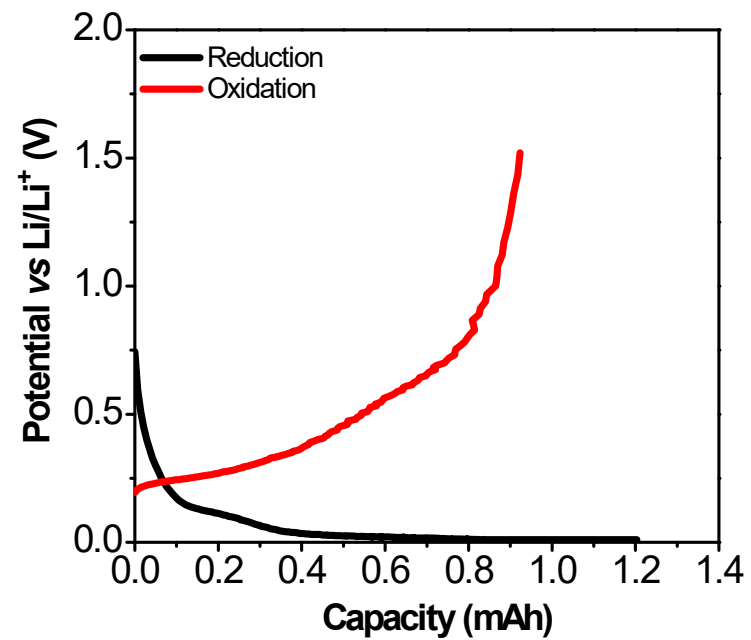

**Figure S5.** Galvanostatic reduction/lithiation and oxidation/delithiation at  $\pm 0.85$  mA for a commercial Si-Gr electrode.

**Section S4. Cyclic voltammetry and EIS measurements of 16 electrolyte formulations.**

Cyclic voltammograms (CVs) recorded for 16 different electrolyte formulations are shown in **Figure S6**, and the corresponding EIS spectra in **Figure S7**.

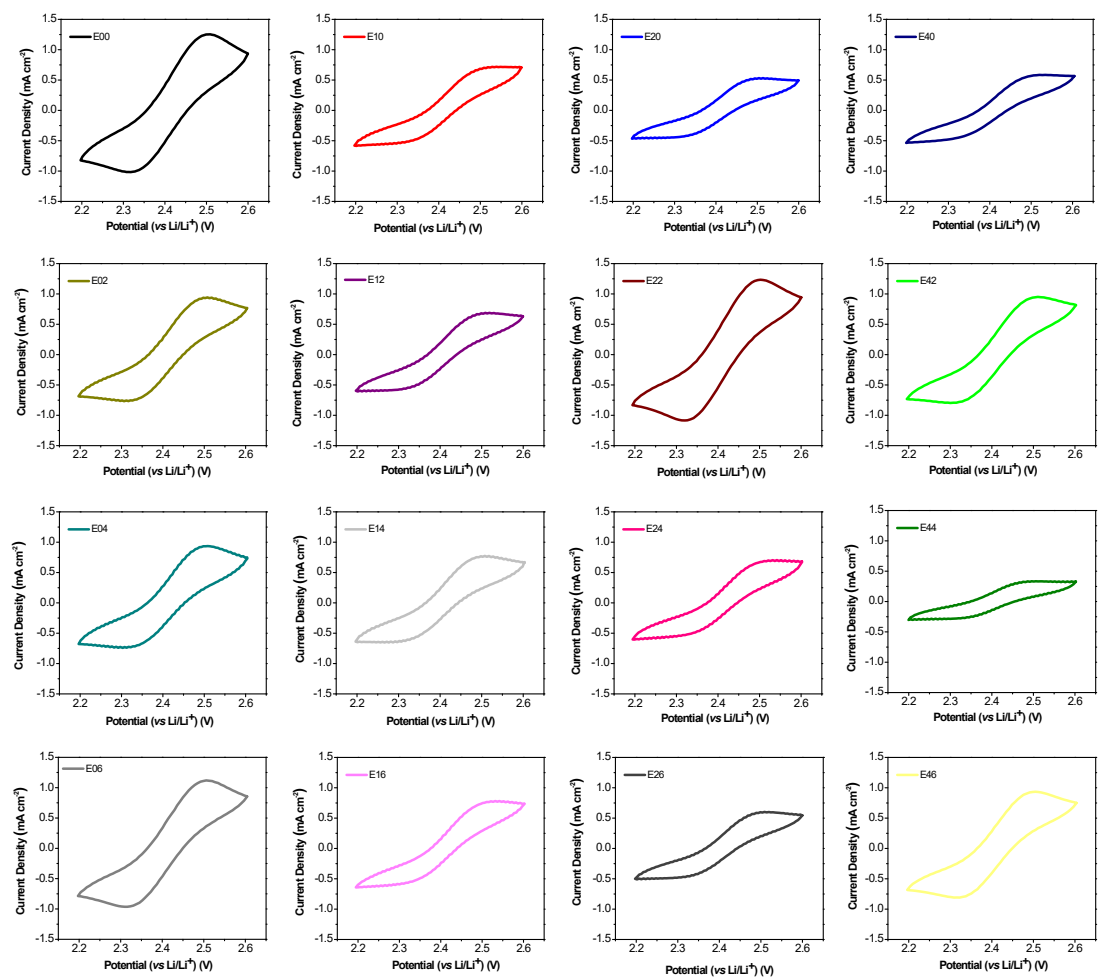

**Figure S6.** CVs recorded on Si-Gr electrodes after formation of an SEI at 10 mV using advanced electrolytes combining different VC-FEC proportions as additives added to the LP30 electrolyte.

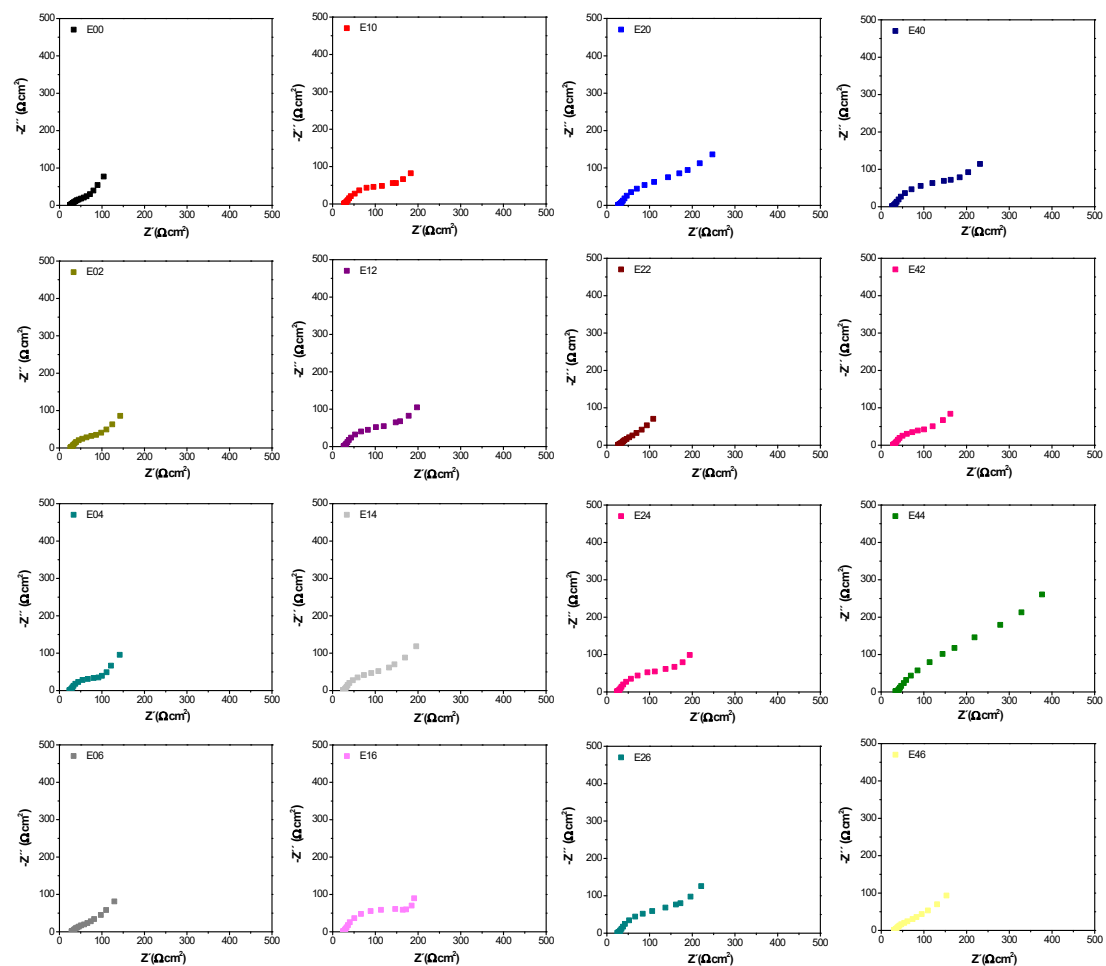

**Figure S7.** Nyquist plots obtained from EIS measurements recorded on Si-Gr electrodes after formation of the SEI at 10 mV using advance electrolytes combining different VC-FEC proportion as additive in LP30 electrolyte.



### Section S5. Electrochemical Impedance Spectroscopy fitting for Cu and Si-Gr electrodes.

The EIS fitting was carried out using Zview impedance fitting software from the Nyquist plot and including the following variables: Frequency (Hz),  $Z'(\Omega)$ ,  $Z''(\Omega)$ ,  $Z(\Omega)$ , - Phase ( $^\circ$ ), Time (s). The equivalent circuit appears as follows:

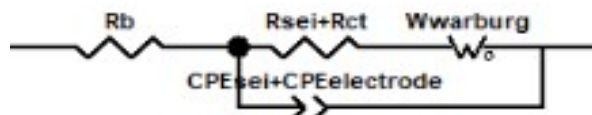

Where,  $R_b$  is the electrolyte resistance,  $R_{sei+Rct}$  is SEI and charge transfer resistance,  $W_o$  is Warburg element, CPE is constant phase element

Values of  $R_{sei}$ , Warburg and CEP with errors for Cu tests can be seen as follows: **Table S1**. EIS equivalent circuit parameters for Cu.

| Test     | $X^2$   | STC     | $R_{sei+Rct}(+)$ | $R_{sei+Rct}(\text{Error})$ | $R_{sei+Rct}(\text{Error}\%)$ |
|----------|---------|---------|------------------|-----------------------------|-------------------------------|
| SEI-Free | 8.1E-05 | 3.3E-03 | 57               | 1.14E+00                    | 1.99E+00                      |
| SEI-1400 | 1.1E-04 | 4.8E-03 | 188              | 3.58E+00                    | 1.91E+00                      |
| SEI-1000 | 1.8E-04 | 6.1E-03 | 1325             | 2.65E+02                    | 2.00E+01                      |
| SEI-800  | 4.4E-05 | 1.4E-03 | 1355             | 9.79E+01                    | 7.22E+00                      |
| SEI-600  | 1.6E-03 | 6.3E-02 | 5931             | 5.07E+02                    | 8.54E+00                      |
| SEI-200  | 1.7E-03 | 7.2E-02 | 9536             | 8.13E+04                    | 8.52E+02                      |

| Test     | $CPE_{sei+CPEelectrode-T}(+)$ | $CPE_{sei+CPEelectrode-T}(+)$ | $CPE_{sei+CPEelectrode-T}(\text{Error})$ | $CPE_{sei+CPEelectrode-T}(\text{Error}\%)$ | $CPE_{sei+CPEelectrode-P}(\text{Error})$ |
|----------|-------------------------------|-------------------------------|------------------------------------------|--------------------------------------------|------------------------------------------|
| SEI-Free | 1.3E-05                       | 0.76                          | 1.93E-06                                 | 1.47E+01                                   | 1.55E-02                                 |
| SEI-1400 | 3.7E-06                       | 0.80                          | 3.31E-07                                 | 9.01E+00                                   | 9.06E-03                                 |
| SEI-1000 | 1.1E-05                       | 0.72                          | 8.39E-07                                 | 7.90E+00                                   | 8.24E-03                                 |
| SEI-800  | 8.7E-06                       | 0.75                          | 3.45E-07                                 | 3.98E+00                                   | 4.17E-03                                 |
| SEI-600  | 4.2E-06                       | 0.82                          | 2.91E-07                                 | 7.25E+00                                   | 8.85E-03                                 |
| SEI-200  | 4.9E-06                       | 0.82                          | 3.33E-07                                 | 6.80E+00                                   | 8.78E-03                                 |

| Test     | Wwarburg-R(+) | Wwarburg-T(+) | Wwarburg-R(Error) | Wwarburg-R(Error%) | Wwarburg-T(Error) | Wwarburg-T(Error%) | Wwarburg-P(Error) | Wwarburg-P(Error%) |
|----------|---------------|---------------|-------------------|--------------------|-------------------|--------------------|-------------------|--------------------|
| SEI-Free | 1E+03         | 1.1E+01       | 1.34E+02          | 1.33E+01           | 2.94E+00          | 2.77E+01           | 5.24E-03          | 1.02E+00           |
| SEI-1400 | 4E+03         | 1.5E+01       | 3.11E+02          | 7.23E+00           | 2.61E+00          | 1.80E+01           | 3.70E-03          | 8.31E-01           |
| SEI-1000 | 4E-04         | 1.0E-20       | 4.15E+01          | 1.03E+07           | 1.07E-20          | 1.07E+02           | 1.83E-02          | 1.35E+01           |
| SEI-800  | 9E-05         | 3.7E-21       | 9.18E+00          | 1.02E+07           | 9.93E-16          | 2.67E+07           | 9.67E-03          | 5.07E+00           |
| SEI-600  | 9E-05         | 1.4E-20       | 3.99E+01          | 4.08E+07           | 1.55E-14          | 1.12E+08           | 6.98E-02          | 3.83E+01           |
| SEI-200  | 4E+00         | 7.0E-10       | 2.45E+05          | 4.96E+06           | 9.70E-05          | 1.38E+07           | 3.43E-02          | 1.91E+01           |

There was no diffusion element for SEI-200 since the high charge transfer resistance do not allows foring diffusion of species. Thus, the Warburg element was removed and the fitting was improved (error of Rsei+Rct decreased from 80 % to 4 %). Thus, henceforth the equivalent circuit used appears as follows.

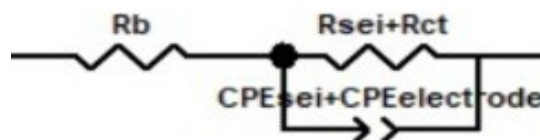

The fitting for SEI-200 was repeated with the new equivalente circuit.

**Table S2.** EIS equivalent circuit parameters for Cu SEI-200.

| Test    | X2       | STC      | Rsei+Rct(+) | Rsei+Rct(Error) | Rsei+Rct(Error%) | CPEsei<br>+CPEelect<br>-T(+) | CPEsei<br>+CPEelect<br>-P(+) | CPEsei<br>+CPEelect<br>-T(Error) | CPEsei<br>+CPEelect<br>-T(Error%) | CPEsei+<br>CPEelectr<br>-P(Error) | CPEsei<br>+CPEelect<br>-P(Error%) |
|---------|----------|----------|-------------|-----------------|------------------|------------------------------|------------------------------|----------------------------------|-----------------------------------|-----------------------------------|-----------------------------------|
| SEI-200 | 8.76E-03 | 4.03E-01 | 17600       | 7.75E+02        | 4.41             | 7.4E-06                      | 7.7E-01                      | 5.7E-07                          | 7.8E+00                           | 1.2E-02                           | 1.5E+00                           |

Using this equivalente circuit for the fitting the error pass from the 80% to 4.41%.

The results obtained for Si-Gr electrode at different potential can be seen in the following table using the equivalent circuit without Warburg element. It should be noted that the lowest 2 or 3 points in some cases were removed when the shape of the Nyquist plot indicated diffusion at lowest frequencies.

**Table S2.** EIS equivalent circuit parameters for Si-Gr at different SEI voltage formation.

| Test     | X2         | STC       | Rsei+<br>Rct(+) | Rsei+<br>Rct(Error) | Rsei+<br>Rct(Error%) | CPEsei<br>+CPEelect<br>-T(+) | CPEsei<br>+CPEelect<br>-P(+) | CPEsei<br>+CPEelect<br>-T(Error) | CPEsei<br>+CPEelect<br>-T(Error%) | CPEsei+<br>CPEelectr<br>-P(Error) | CPEsei<br>+CPEelect<br>-P(Error%) |
|----------|------------|-----------|-----------------|---------------------|----------------------|------------------------------|------------------------------|----------------------------------|-----------------------------------|-----------------------------------|-----------------------------------|
| SEI-10   | 0.00021383 | 0.0081257 | 413.2           | 54.697              | 13.237               | 0.0025136                    | 0.4669                       | 0.00015861                       | 6.3101                            | 0.012949                          | 2.7734                            |
| SEI-50   | 0.00028121 | 0.011811  | 838.5           | 116.11              | 13.847               | 0.0025774                    | 0.45929                      | 0.00010796                       | 4.1887                            | 0.010062                          | 2.1908                            |
| SEI-100  | 0.0011881  | 0.026139  | 934.1           | 39.951              | 4.277                | 0.00032452                   | 0.76434                      | 1.65E-05                         | 5.0943                            | 0.014126                          | 1.8481                            |
| SEI-200  | 0.0015642  | 0.037541  | 2911            | 115.8               | 3.978                | 0.00024353                   | 0.80414                      | 8.66E-06                         | 3.5562                            | 0.010733                          | 1.3347                            |
| SEI-400  | 0.00067097 | 0.013419  | 4373            | 123.73              | 2.8294               | 0.00019105                   | 0.82598                      | 4.05E-06                         | 2.1197                            | 0.0074983                         | 0.90781                           |
| SEI-Free | 1.05E-06   | 1.46E-05  | 8.717           | 0.85479             | 9.806                | 0.0035955                    | 0.4002                       | 0.001065                         | 29.62                             | 0.036042                          | 9.006                             |

The results obtained for Si-Gr electrode using different VC-FEC combination as additive can be found as follows:

**Table S2.** EIS equivalent circuit parameters for SEI formed using different VC-FEC combination as additive.

| Test | X2         | STC       | Rsei+<br>Rct(+) | Rsei+<br>Rct(Error) | Rsei+<br>Rct(Error%) | CPEsei<br>+CPEelect<br>-T(+) | CPEsei<br>+CPEelect<br>-P(+) | CPEsei<br>+CPEelect<br>-T(Error) | CPEsei<br>+CPEelect<br>-T(Error%) | CPEsei+<br>CPEelectr<br>-P(Error) | CPEsei<br>+CPEelect<br>-P(Error%) |
|------|------------|-----------|-----------------|---------------------|----------------------|------------------------------|------------------------------|----------------------------------|-----------------------------------|-----------------------------------|-----------------------------------|
| E00  | 0.00021383 | 0.0081257 | 413.2           | 54.697              | 13.237               | 0.0025136                    | 0.4669                       | 0.00015861                       | 6.3101                            | 0.012949                          | 2.7734                            |
| E02  | 0.0005128  | 0.020512  | 387.7           | 24.557              | 6.334                | 0.0011544                    | 0.58301                      | 7.04E-05                         | 6.1015                            | 0.01407                           | 2.4133                            |
| E04  | 0.000828   | 0.03312   | 343.7           | 19.36               | 5.6328               | 0.00084417                   | 0.6267                       | 6.06E-05                         | 7.1744                            | 0.016241                          | 2.5915                            |
| E06  | 0.00011543 | 0.0020778 | 317.9           | 34.587              | 10.88                | 0.0017683                    | 0.52671                      | 0.00013538                       | 7.6559                            | 0.01793                           | 3.4042                            |
| E10  | 0.00055161 | 0.023168  | 519.7           | 20.431              | 3.9313               | 0.0007361                    | 0.61753                      | 3.39E-05                         | 4.6051                            | 0.010895                          | 1.7643                            |
| E12  | 0.00083889 | 0.035233  | 593.3           | 28.616              | 4.8232               | 0.00068779                   | 0.61337                      | 3.69E-05                         | 5.3662                            | 0.012495                          | 2.0371                            |
| E14  | 0.00069246 | 0.027698  | 554.1           | 34.384              | 6.2054               | 0.000784                     | 0.6204                       | 4.45E-05                         | 5.6783                            | 0.01314                           | 2.118                             |
| E16  | 0.0033634  | 0.15472   | 595.2           | 30.744              | 5.1653               | 0.0005361                    | 0.65407                      | 4.44E-05                         | 8.2865                            | 0.02012                           | 3.0761                            |
| E20  | 0.00042938 | 0.017175  | 845.7           | 46.264              | 5.4705               | 0.0006541                    | 0.6006                       | 2.67E-05                         | 4.078                             | 0.0091714                         | 1.527                             |

|     |            |           |       |        |        |            |         |             |        |           |        |
|-----|------------|-----------|-------|--------|--------|------------|---------|-------------|--------|-----------|--------|
| E22 | 0.0001112  | 0.0035585 | 2000  | 300    | 40,27  | 0,0038157  | 0,44849 | 1,37E-04    | 3,5847 | 0,0092662 | 2,0661 |
| E24 | 0.0018894  | 0.08691   | 763.5 | 48.191 | 6.3119 | 0.00097058 | 0.5744  | 5.61E-05    | 5.777  | 0.015048  | 2.6198 |
| E26 | 0.00082885 | 0.02155   | 772.2 | 40.838 | 5.2885 | 0.00043189 | 0.71532 | 2.26E-05    | 5.2405 | 0.013326  | 1.8629 |
| E40 | 0.0024159  | 0.11113   | 866.9 | 55.444 | 6.3957 | 0.00073157 | 0.56776 | 4.80E-05    | 6.5575 | 0.016047  | 2.8264 |
| E42 | 0.00040712 | 0.0073282 | 393.2 | 36.397 | 9.2566 | 0.00075234 | 0.63631 | 0.000067333 | 8.9498 | 0.020972  | 3.2959 |
| E44 | 0.00016592 | 0.0029866 | 1245  | 101.54 | 8.1558 | 0.00044212 | 0.64816 | 1.91E-05    | 4.3162 | 0.010054  | 1.5512 |
| E46 | 0.00013087 | 0.0023557 | 433.8 | 53.728 | 12.385 | 0.0015221  | 0.55119 | 1.10E-04    | 7.2006 | 0.017069  | 3.0968 |
